# Supplementary material for: Rigidify styryl-pyridinium dyes to benzo[ h ]coumarin-based bright two-photon fluorescent probes for cellular bioimaging
Source: Royal Society of Chemistry journal article supplement (doi:10.1039/d3ra08269e), 2024-01-01
Supplement: d3ra08269e1.pdf [file d3ra08269e1.pdf]

*Supporting Information for*

**Rigidify styryl-pyridinium dyes to benzo[h]coumarin-based bright two-photon fluorescent probes for cellular bioimaging**

Chengjing Zhang,<sup>a</sup> Zihao Yu,<sup>b</sup> Yang Liu,<sup>a</sup> Wendong Jin,<sup>a</sup> Zhiqiang Liu<sup>a\*</sup> Xiaoqiang Yu<sup>a\*</sup>

---

## Table of contents

|                              |         |
|------------------------------|---------|
| Materials and apparatus----- | S3-S4   |
| Table S1, Table S2-----      | S5      |
| Fig. S1, Fig. S2-----        | S6      |
| Fig. S3, Fig. S4-----        | S7      |
| Fig. S5, Fig. S6-----        | S8      |
| Fig. S7-----                 | S9      |
| Characterization-----        | S10-S15 |
| Reference-----               | S16     |

---

## Materials and instruments

6-(dimethylamino)-1-hydroxy-2-naphthaldehyde was obtained through previous synthesis routes.<sup>1</sup> The reactants were purchased from J&K Chemical Ltd, Beijing InnoChem Science & Technology Co., Ltd, Bide Pharmatech Ltd and TCI Chemical Reagent Shanghai Co., Ltd. Hoechst 333342 was purchased from Sigma-Aldrich. Commercial probe Mito Tracker Green (MTG) was purchased from Molecular Probe. The column chromatography silica gel powder (200-300 mesh) and the thin-layer chromatography silica gel plate all from Qingdao Ocean Chemical.

<sup>1</sup>H NMR (400 MHz) and <sup>13</sup>C NMR (100 MHz) spectra were obtained on a Bruker AVANCE III spectrometer. High-resolution mass spectra (HRMS) were obtained on an Agilent Technologies 6510 Q-TOF LC/MS instrument. The UV-Vis absorption spectra were measured on a U-4100 spectrophotometer, and the fluorescence emission spectra were measured on a Horiba FluoroMax-4 fluorescence spectrophotometer. The fluorescence quantum yield was measured using a calibrated integrating sphere on Edinburgh FLS920/LP920 fluorescence spectrophotometer. Using Leica TCS SP8 for imaging.

The calculation process of yield :

Yield of (**Compound 2**) =  $m_2/(n_2 \cdot M_2) = 840 \text{ mg}/(5 \text{ mmol} \cdot 229.11 \text{ g/mol}) = 73\%$ .  
 $n_2 = n_1 = 5 \text{ mmol}$ . Yield of (**Compound 3**) =  $m_3/(n_3 \cdot M_3) = 99 \text{ mg}/(0.9 \text{ mmol} \cdot 316.12 \text{ g/mol}) = 35\%$ .  $n_2 = n_1 = 0.9 \text{ mmol}$ . Yield of **BS-MN** =  $m_{\text{BS-MN}}/(n_{\text{BS-MN}} \cdot M_{\text{BS-MN}}) = 54 \text{ mg}/(0.44 \text{ mmol} \cdot 446.08 \text{ g/mol}) = 28\%$ .  $n_{\text{BS-MN}} = n_2 = 0.44 \text{ mmol}$ .  
Yield of **BS-CN** =  $m_{\text{BS-CN}}/(n_{\text{BS-CN}} \cdot M_{\text{BS-CN}}) = 74 \text{ mg}/(0.52 \text{ mmol} \cdot 458.05 \text{ g/mol}) = 31 \%$ .  
 $n_{\text{BS-CN}} = n_3 = 0.52 \text{ mmol}$ .

Method details about the molecular docking analysis:

Nucleic acid preparation: The initial structure of RNA was downloaded from RCSB Protein Data Bank (PDB code: 5ml7). The original ligand and water were removed by PyMOL for docking studies. Ligand (BM-CN and BM-MN) preparation: using the optimized compound structure, the partial atomic charges were obtained by restrained electrostatic potential (RESP) calculating with Gaussian 09 package at the level of HF/6-31g\*. After that, the docking calculations were performed by the AutoDock 4 suite of programs, using ligand flexible docking approach that allows ligand flexibility.

The Lamarckian genetic algorithm was chosen as the search protocol using the default

---

parameters except for number of GA runs ( $ga\_run = 50$ ) and the maximum number of energy evaluations ( $ga\_num\_evals = 2500000$ ).

**Table S1** The photophysical properties of **BS-MN** and **BS-CN**

| Probes       | Solvents         | $\lambda_{ab}/nm$ | $\lambda_{em}/nm$ | Stokes shift/nm | $\epsilon^c/ 10^4 M^{-1}\cdot cm^{-1}$ | $\Phi_s$ (%) |
|--------------|------------------|-------------------|-------------------|-----------------|----------------------------------------|--------------|
| <b>BS-MN</b> | Toluene          | 477               | 603               | 126             | 21800                                  | 0.84         |
|              | DCM              | 525               | 671               | 146             | 27800                                  | 7.46         |
|              | THF              | 480               | 663               | 183             | 22700                                  | 3.96         |
|              | Acetone          | 475               | 670               | 195             | 23000                                  | 3.33         |
|              | EtOH             | 483               | 668               | 185             | 23700                                  | 3.11         |
|              | MeOH             | 480               | 673               | 193             | 22900                                  | 3.03         |
|              | DMSO             | 476               | 687               | 211             | 22100                                  | 0.70         |
|              | H <sub>2</sub> O | 437               | 658               | 221             | 16700                                  | 0.11         |
| <b>BS-CN</b> | Toluene          | 458               | 589               | 131             | 18100                                  | 0.63         |
|              | DCM              | 540               | 657               | 117             | 47700                                  | 34.48        |
|              | THF              | 497               | 647               | 150             | 20800                                  | 32.09        |
|              | Acetone          | 495               | 660               | 165             | 39800                                  | 29.61        |
|              | EtOH             | 509               | 659               | 150             | 43600                                  | 27.26        |
|              | MeOH             | 498               | 659               | 150             | 52300                                  | 25.73        |
|              | DMSO             | 495               | 664               | 169             | 36900                                  | 35.60        |
|              | H <sub>2</sub> O | 487               | 653               | 166             | 27200                                  | 2.65         |

Abbreviations:  $\lambda_{abs}$  = absorption maximum;  $\lambda_{em}$  = emission maximum;  $\epsilon^c$ : molar extinction coefficient;  $\Phi_s$  = fluorescence quantum yield in solution. Concentration: 10  $\mu$ M.

**Table S2** Quantum yields of cationic dyes in the literatures.

| Structure                                                                           | Fluorescent probe        | $\Phi_s$ (%) | Staining concentration ( $\mu$ M) |
|-------------------------------------------------------------------------------------|--------------------------|--------------|-----------------------------------|
| 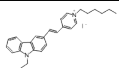 | CAI <sup>2</sup>         | 9.34         | 2                                 |
|  | CAEI <sup>2</sup>        | 13.80        | 2                                 |
|  | BuBtC <sup>3</sup>       | 11.83        | 2                                 |
|  | MeBtC <sup>3</sup>       | 10.73        | 2                                 |
|  | Merocyanine <sup>4</sup> | 5.84         | 5                                 |
|  | PQO <sup>5</sup>         | 0.30         | 5                                 |

|                                                                                   |                  |       |     |
|-----------------------------------------------------------------------------------|------------------|-------|-----|
|  | PQP <sup>5</sup> | 0.70  | 5   |
|  | BS-CN            | 35.60 | 0.5 |

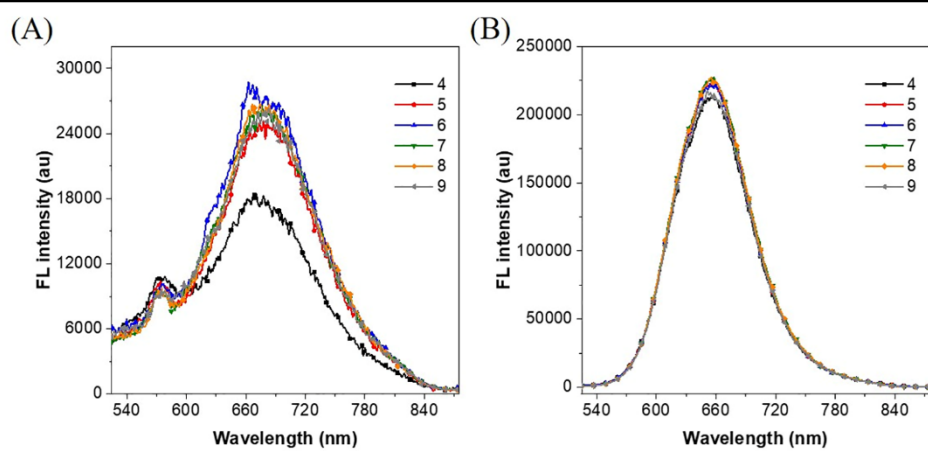

**Fig. S1.** Fluorescence spectra of **BS-MN** (A) and **BS-CN** (B) in buffer solutions with different pH.  $\lambda_{ex}$ =488 nm, 10  $\mu$ M

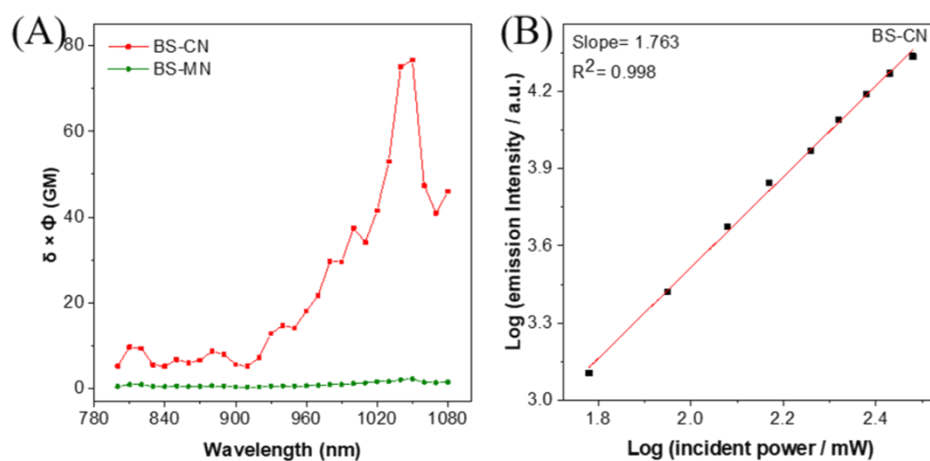

**Fig. S2.** Two-photon absorption cross-sections of **BS-CN** and **BS-MN** at different wavelengths in DMSO (A); Linear relationship between maximum fluorescence intensity and power (B).

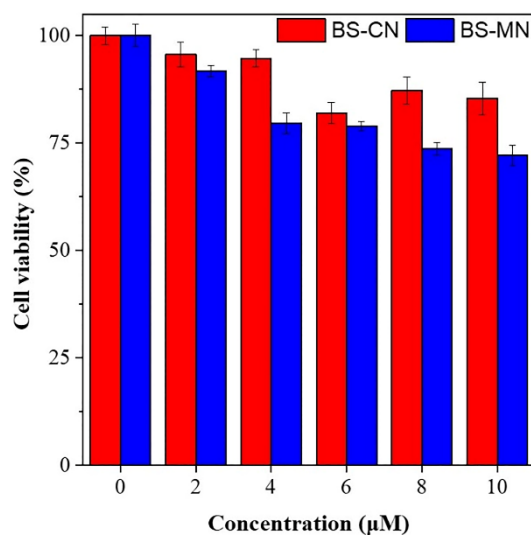

**Fig. S3.** Cytotoxicity of BS-MN and BS-CN at various concentrations in HeLa cells for 24 h.

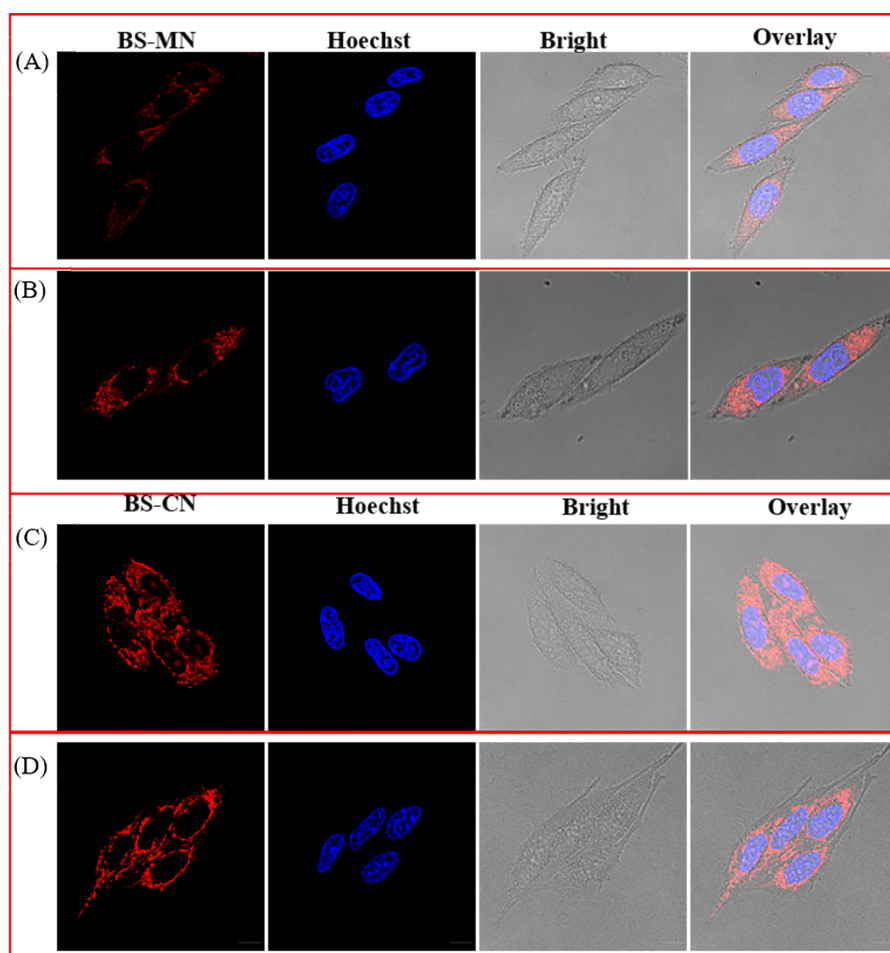

**Fig. S4.** Staining results of BS-MN (A and B) and BS-CN (C and D) with different concentrations in HeLa Cells. A and C: 500 nM; B and D: 1 µM BS-MN and BS-CN:  $\lambda_{\text{ex}} = 488 \text{ nm}$ ,  $\lambda_{\text{em}} = 600\text{-}700 \text{ nm}$ , 30 min. Hoechst: 2 µM,  $\lambda_{\text{ex}} = 405 \text{ nm}$ ,  $\lambda_{\text{em}} = 420\text{-}460 \text{ nm}$ , 10 min. Scale bar = 10 µm.

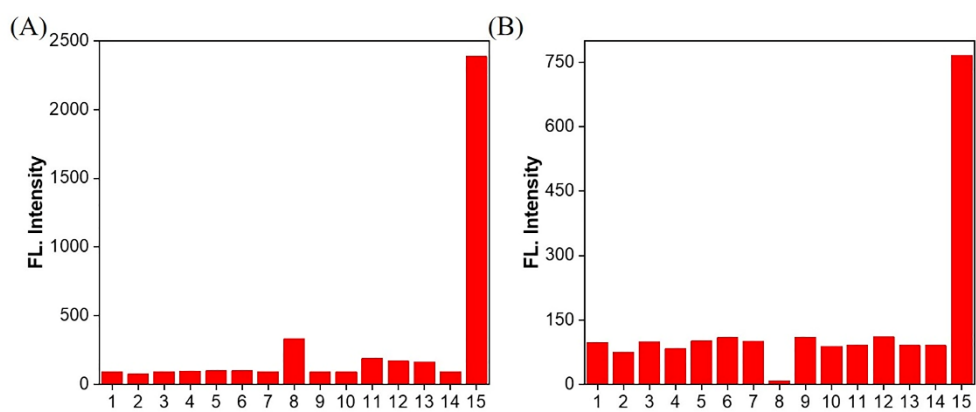

**Fig. S5.** The fluorescent intensity of **BS-MN** (A, 10 μM) and **BS-CN** (B, 10 μM) with 1mM of various biological reagents. 1. Ca<sup>2+</sup>: CaCl<sub>2</sub>, 2. Cu<sup>2+</sup>: CuSO<sub>4</sub>, 3. Mg<sup>2+</sup>: MgSO<sub>4</sub>, 4. Na<sup>+</sup>: NaCl, 5. NH<sub>4</sub><sup>+</sup>: NH<sub>4</sub>Cl, 6. K<sup>+</sup>: KCl, 7. NO<sub>3</sub><sup>-</sup>: NaNO<sub>3</sub>, 8. PO<sub>3</sub><sup>2-</sup>: Na<sub>2</sub>HPO<sub>3</sub>, 9. SO<sub>4</sub><sup>2-</sup>: MgSO<sub>4</sub>, 10. Cl<sup>-</sup>: NaCl, 11. H<sub>2</sub>PO<sub>4</sub><sup>-</sup>: NaH<sub>2</sub>PO<sub>4</sub>, 12. HCO<sub>3</sub><sup>-</sup>: NaHCO<sub>3</sub>, 13. HS<sup>-</sup>: NaHS, 14. HSO<sub>3</sub><sup>-</sup>: NaHSO<sub>3</sub>, 15. RNA.

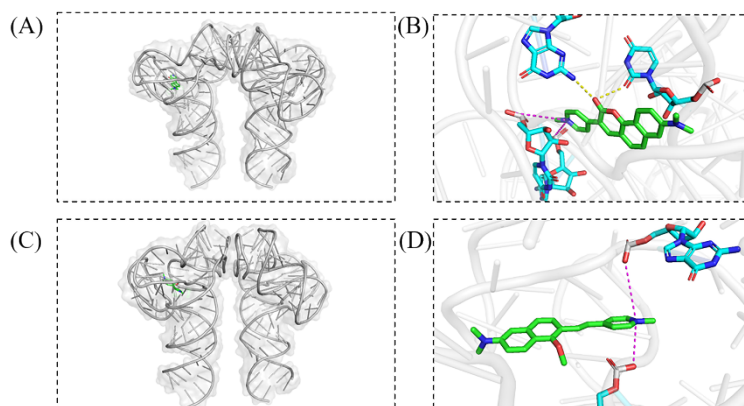

**Fig. S6.** The molecular docking calculations based on the structure optimized BS-CN (A and B) and BS-MN (C and D) with RNA secondary structure fragments. Yellow line: Hydrogen bond force; Purple line: electrostatic force.



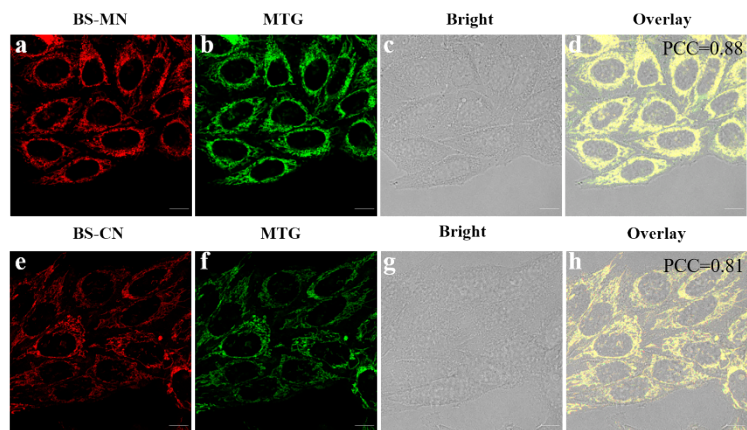

**Fig. S7.** Co-localization experiment with incubation time of 60 hours. BS-MN and BS-CN:  $\lambda_{\text{ex}} = 488 \text{ nm}$ ,  $\lambda_{\text{em}} = 600\text{-}700 \text{ nm}$ ; MTG:  $\lambda_{\text{ex}} = 488 \text{ nm}$ ,  $\lambda_{\text{em}} = 505\text{-}600 \text{ nm}$ , 200 nM, 30 min. Scale bar = 10  $\mu\text{m}$ .

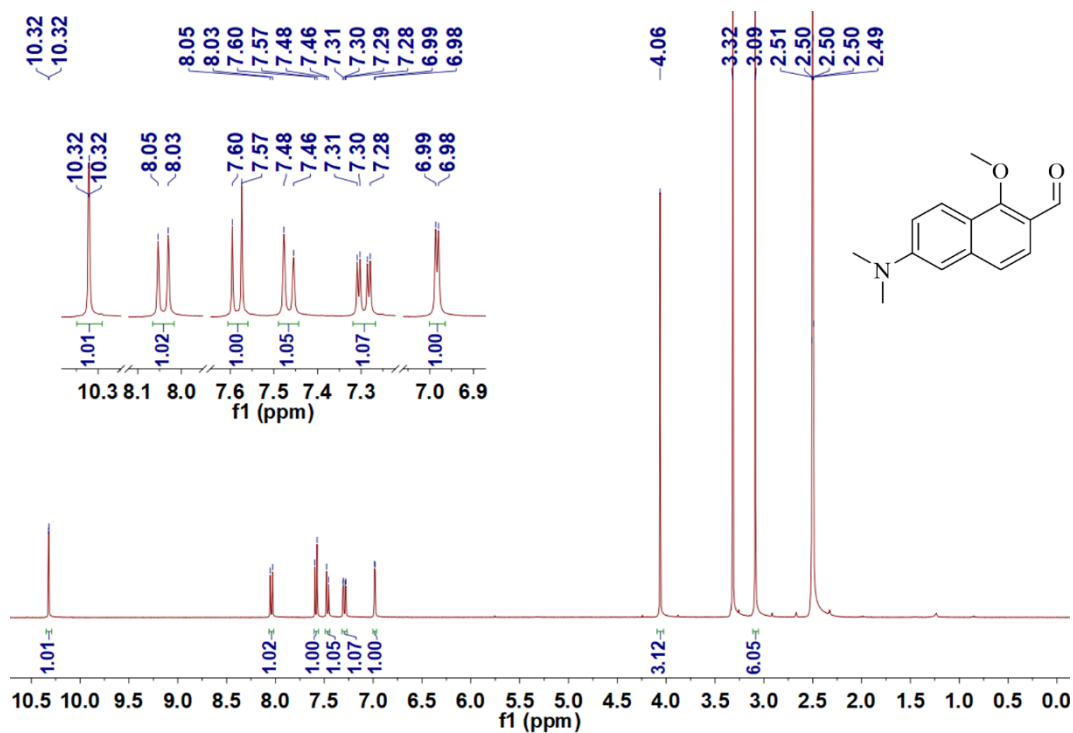

### Characterization

Fig. S8. <sup>1</sup>H NMR spectrum of compound 2 in DMSO-*d*<sub>6</sub>.

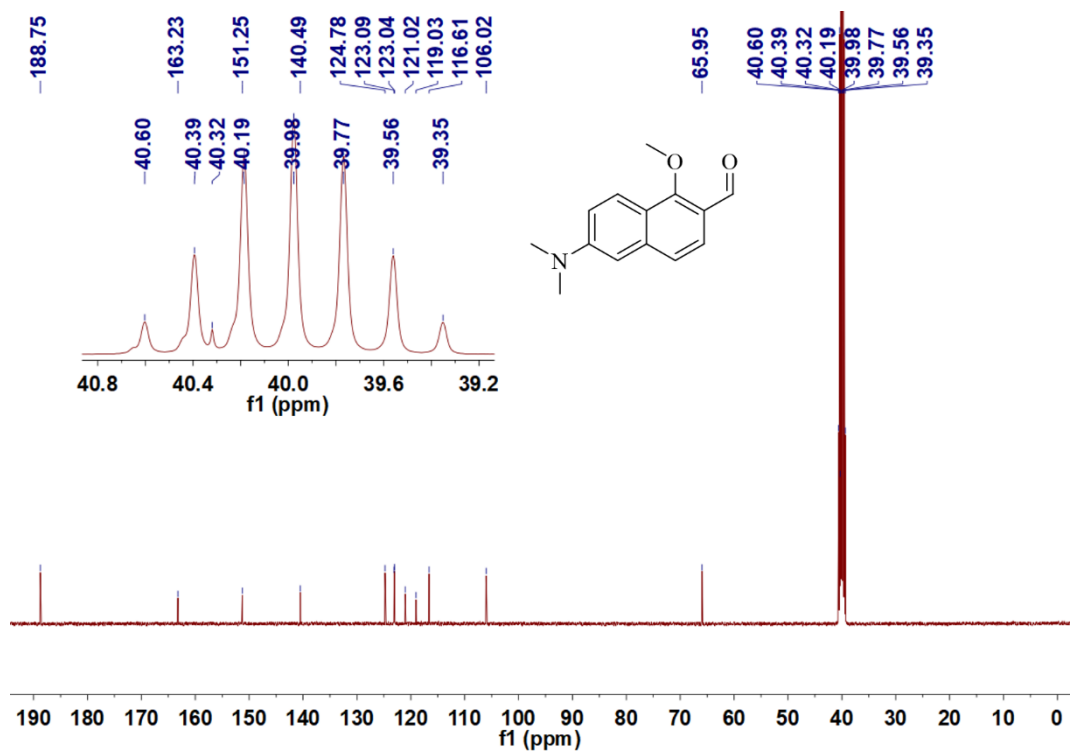

Fig. S9. <sup>13</sup>C NMR spectrum of compound 2 in DMSO-*d*<sub>6</sub>.

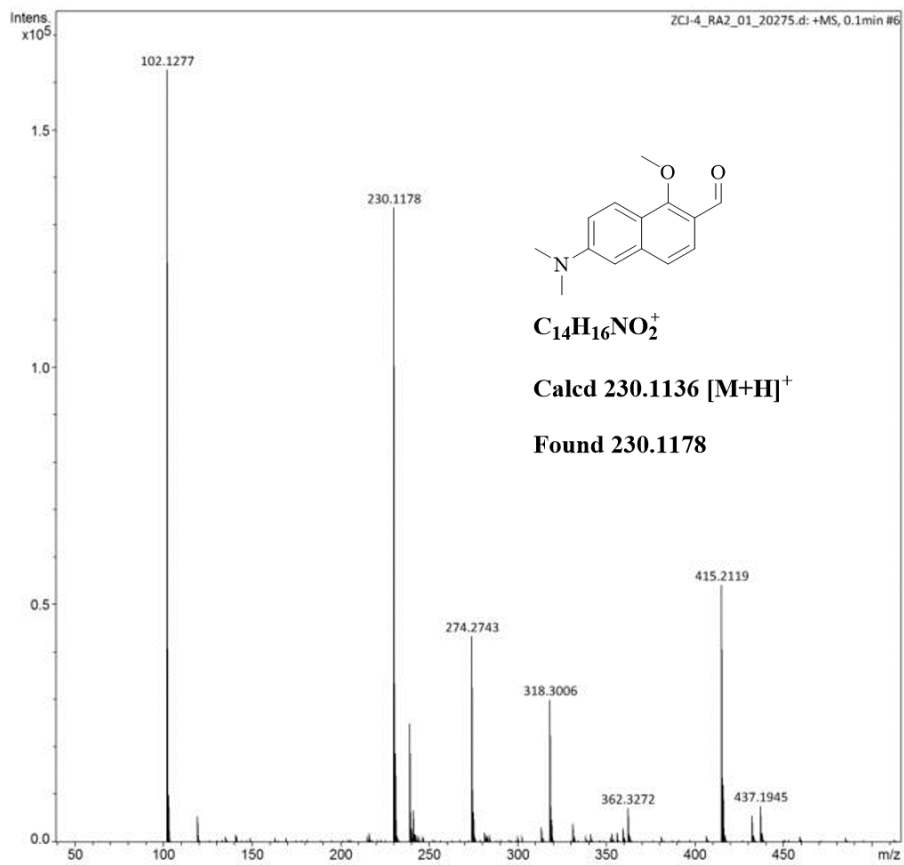

Fig. S10. HRMS of compound 2.

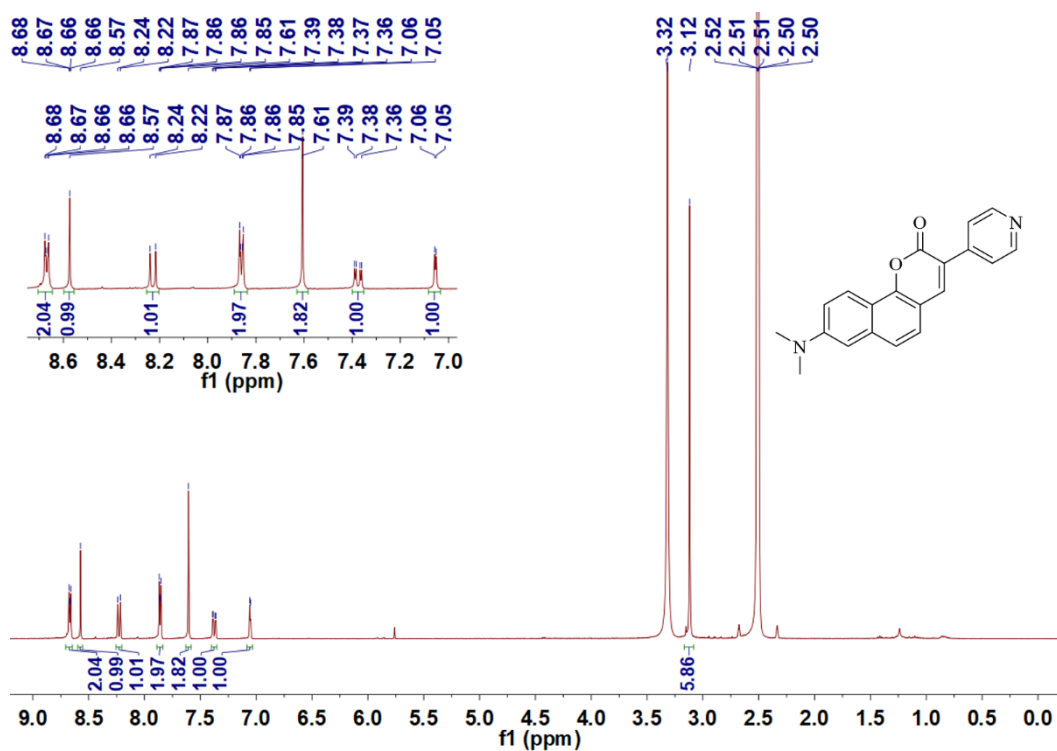

Fig. S11. <sup>1</sup>H NMR spectrum of compound 3 in DMSO-*d*<sub>6</sub>.

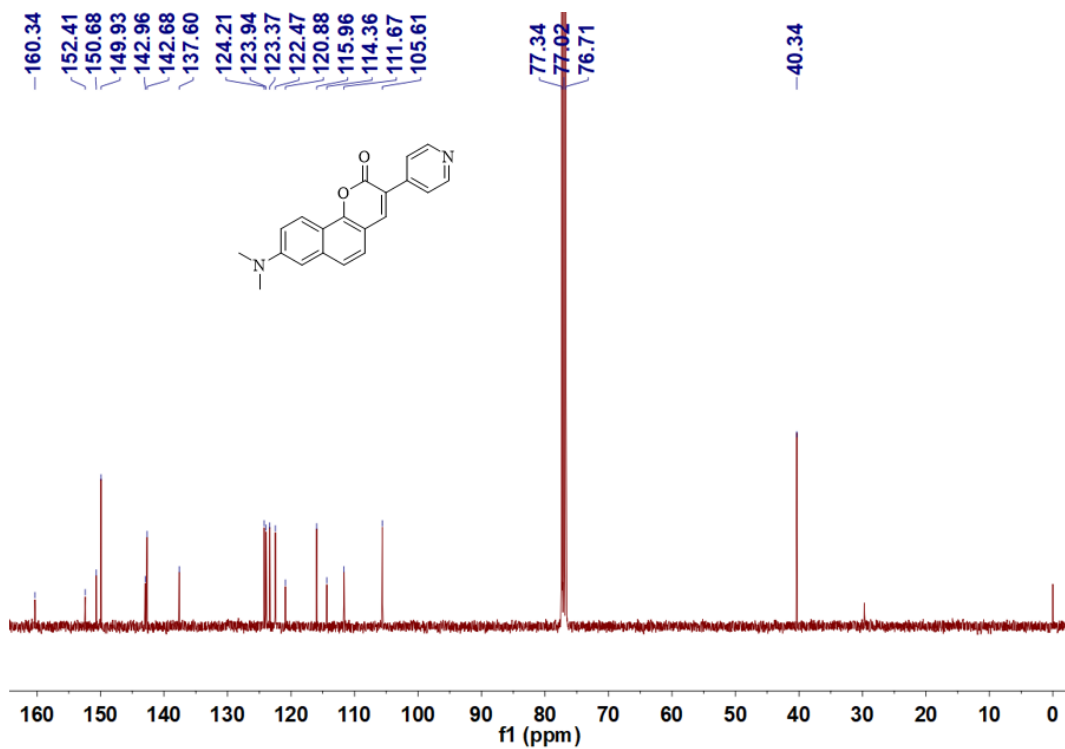

**Fig. S12.** <sup>13</sup>C NMR spectrum of **compound 3** in CDCl<sub>3</sub>

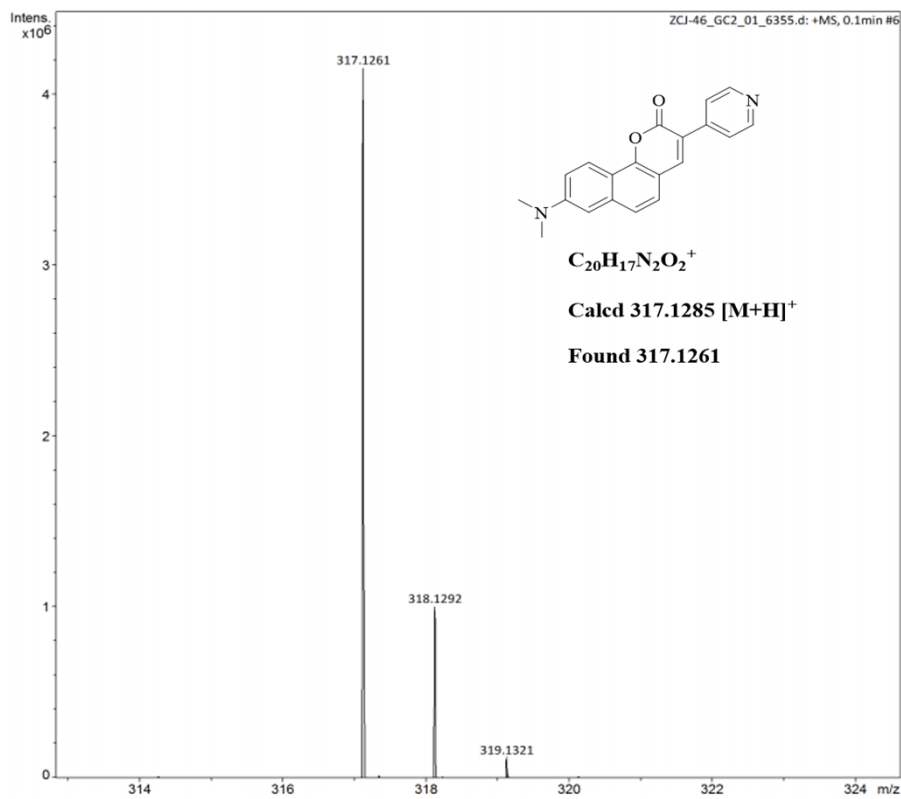

**Fig. S13.** HRMS of **compound 3**.

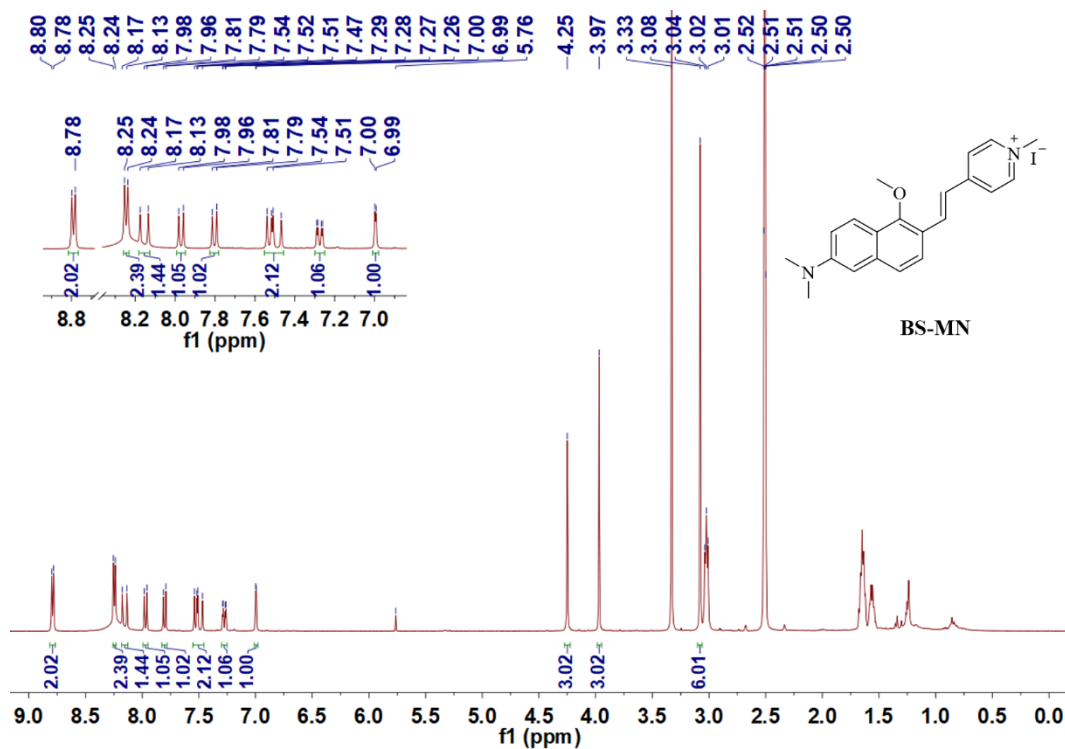

Fig. S14. <sup>1</sup>H NMR spectrum of BS-MN in DMSO-*d*<sub>6</sub>.

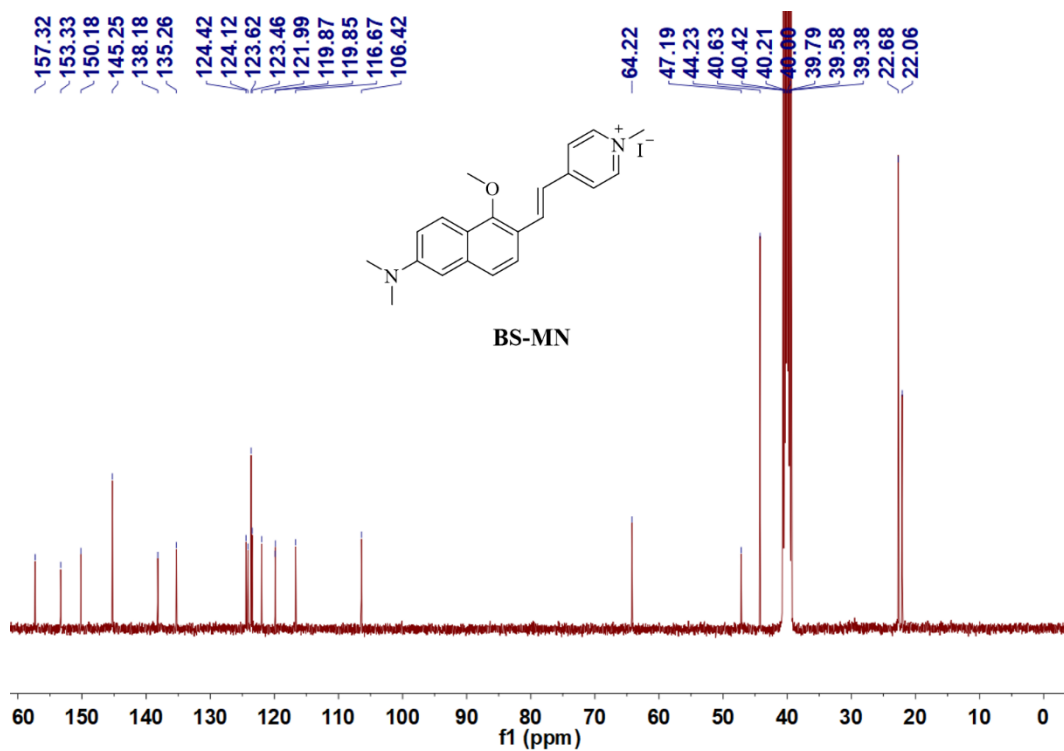

Fig. S15. <sup>13</sup>C NMR spectrum of BS-MN in DMSO-*d*<sub>6</sub>.

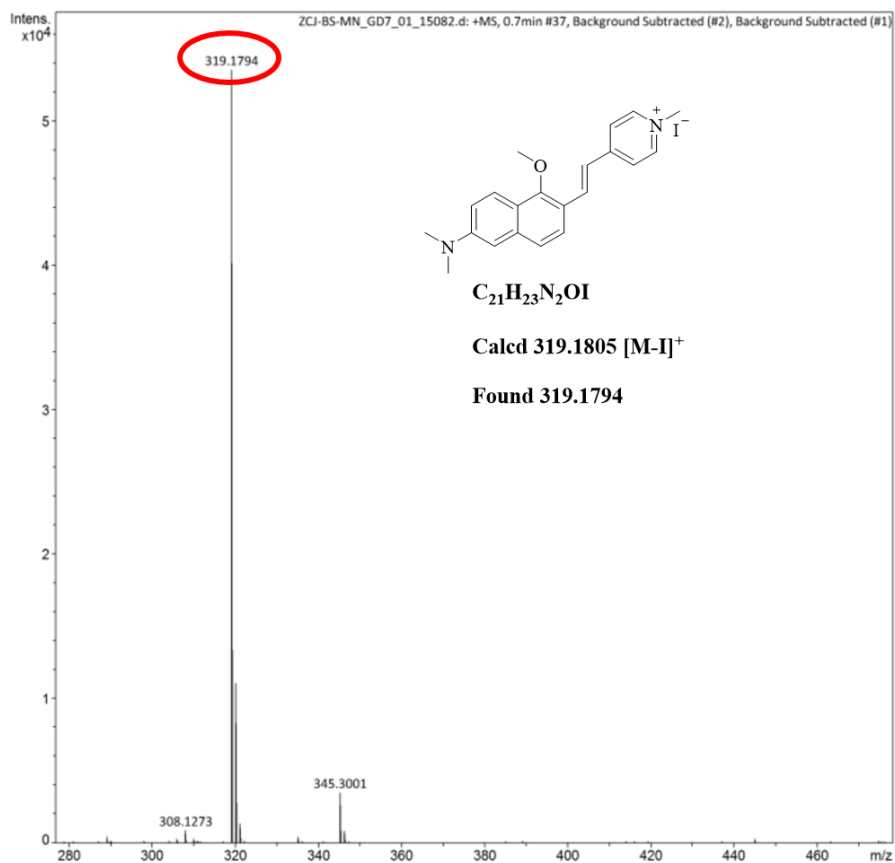

Fig. S16. HRMS of BS-MN.

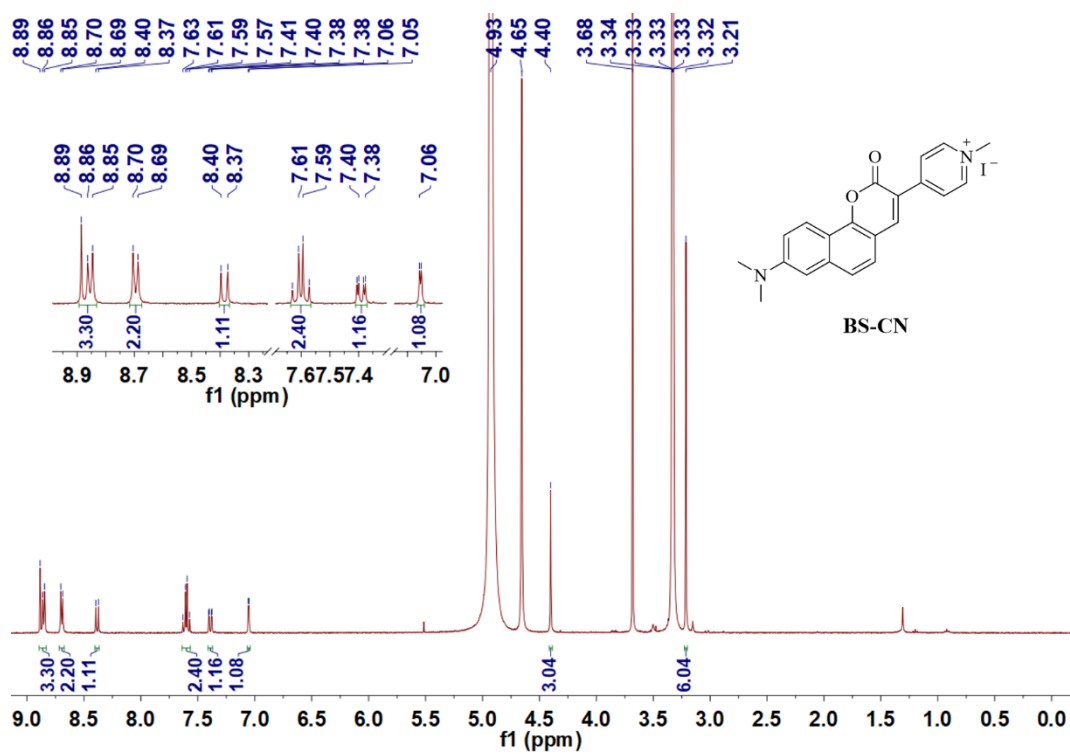

Fig. S17. <sup>1</sup>H NMR spectrum of BS-CN in Methanol-*d*<sub>4</sub>.

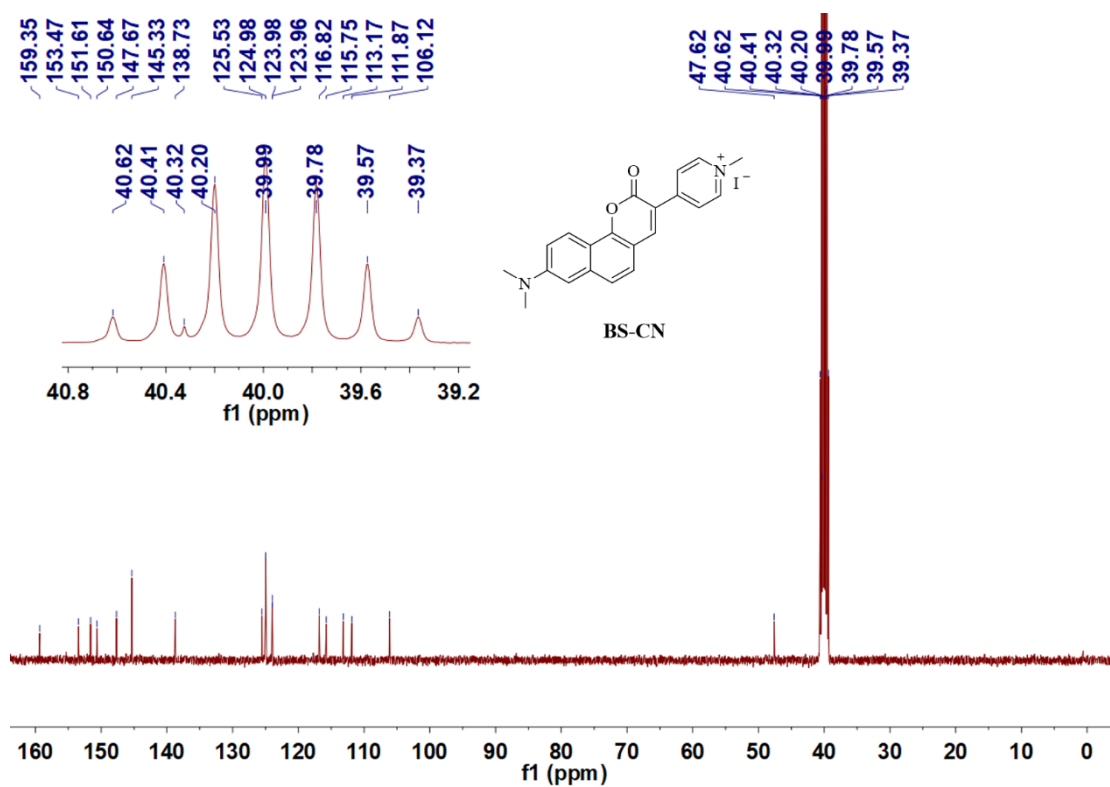

**Fig. S18.** <sup>13</sup>C NMR spectrum of BS-CN in DMSO-*d*<sub>6</sub>

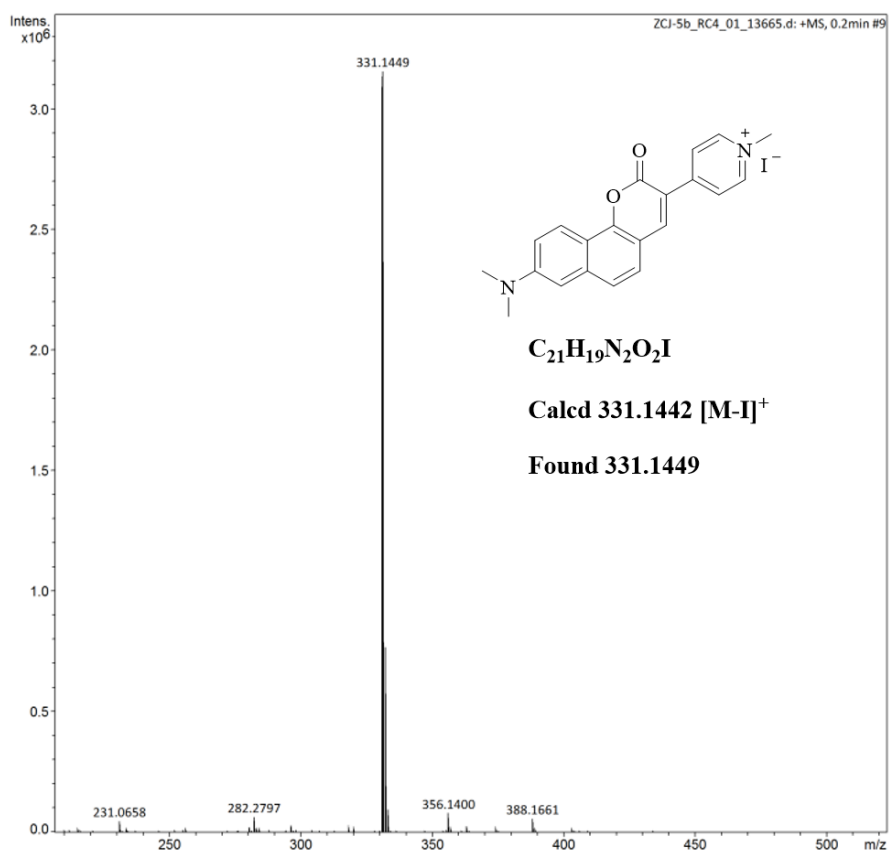

**Fig. S19.** HRMS of BS-CN

---

## Reference

- 1 G. Niu, W. Liu, H. Xiao, H. Zhang, J. Chen, Q. Dai, J. Ge, J. Wu, P. Wang, *Chem Asian J*, 2016, **11**, 498-504.
- 2 F. Miao, W. Zhang, Y. Sun, R. Zhang, Y. Liu, F. Guo, G. Song, M. Tian, X. Yu, *Biosensors and Bioelectronics*, 2014, **55**, 423–429.
- 3 P. Deore, D. Coman and R. Manderville, *Chem. Commun.*, 2019, **55**, 3540.
- 4 W. Niu, L. Guo, Y. Li, S. Shuang, C. Dong, and M. Wong, *Anal. Chem.*, 2016, **88**, 1908–1914.
- 5 J. Niu, S. Yang, M. Tian, X. Yu, *Sensors and Actuators B: Chemical*, 2022, **372**, 132693.
